# Supplementary material for: In situ optical studies of methane and simulated biogas oxidation on high temperature solid oxide fuel cell anodes
Source: Royal Society of Chemistry journal article supplement (doi:10.1039/c3cp53278j), 2013-11-07
Supplement: c3cp53278j.pdf [file c3cp53278j.pdf]

## ***In situ* optical studies of methane and biogas oxidation on high temperature solid oxide fuel cell anodes**

John D. Kirtley,<sup>a</sup> Daniel A. Steinhurst,<sup>b</sup> Jeffery C. Owrutsky,<sup>c</sup> Michael B. Pomfret,<sup>\*c</sup> and Robert A. Walker<sup>\*a</sup>

### **Supporting Information**

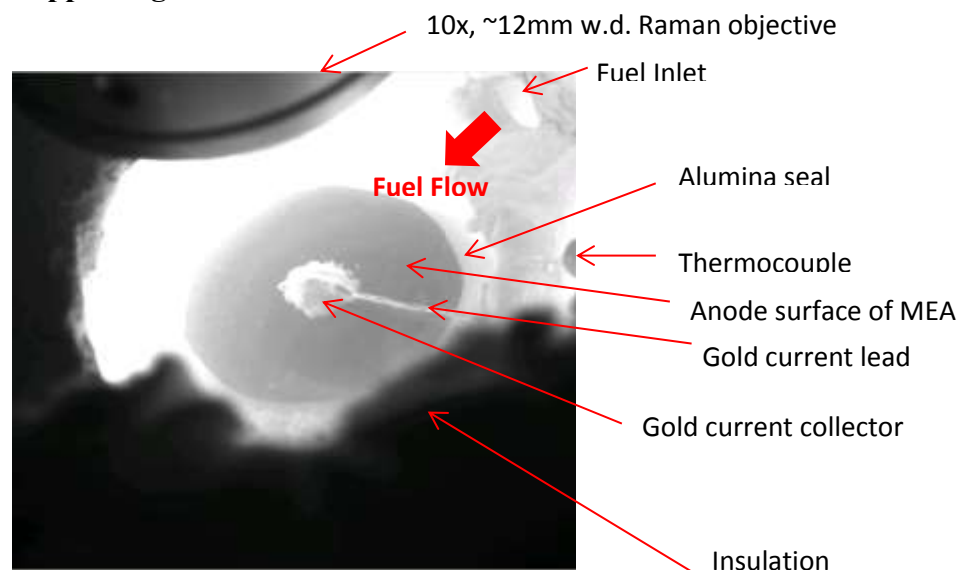

**Figure S1.** Black and white photograph of an operational anode-supported MEA.

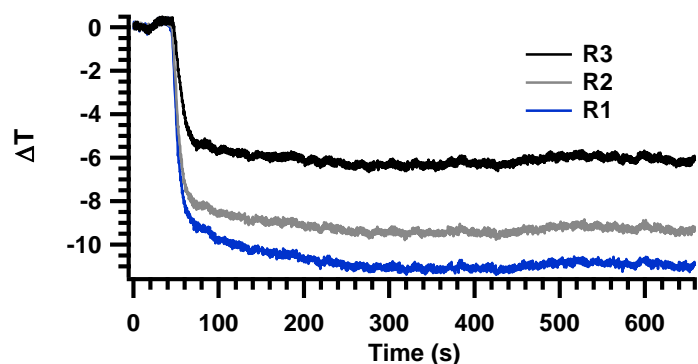

**Figure S2.** Time-dependent  $\Delta T$  data collected from three regions as shown in Fig. 1 of the main text, where R1 represents a sample region roughly halfway between the fuel inlet and the gold current collector. R2 represents a region closer to the current collector, and R3 represents a

region away from the fuel stream. This data was collected during anode exposure to biogas under OCV conditions at 800°C.
